# Supplementary material for: Four-Year Overview of Winter Colony Losses in Greece: Citizen Science Evidence That Transitioning to Organic Beekeeping Practices Reduces Colony Losses
Source: MDPI journal article supplement (doi:10.3390/insects14020193), 2023-02-15
Supplement: s1 [file s1]

# Four-Year Overview of Winter Colony Losses in Greece: Citizen Science Evidence That Transitioning to Organic Beekeeping Practices Reduces Colony Losses

## Supplementary Materials

To maintain anonymity, regions with fewer than three participants in a particular year were excluded from the year's regional calculations. Similarly, regions with fewer than five participants in the total reference period were also excluded from the total years' calculations (Sup. Tables S1, S2).

**Table S1:** Summary of participation and risk of hive losses across the years and regions

| Region          | 2018 | 2019 | 2020 | 2021 | Total Years |
|-----------------|------|------|------|------|-------------|
| Achaïas         |      | 0.66 | 0.77 | 0.97 | 0.66        |
| Aitolokarnanias | 0.60 | 0.58 | 0.49 | 0.84 | 0.61        |
| Argolidas       | 0.69 |      |      |      | 0.8         |
| Arkadias        |      |      |      |      | 0.51        |
| Artas           | 1.89 |      |      |      | 1.53        |
| Attikis         | 1.13 | 1.32 | 0.57 | 1.08 | 1.08        |
| Biotias         | 1.21 | 0.28 | 0.84 | 0.71 | 0.86        |
| Chalkidikis     | 1.60 | 1.26 | 1.87 |      | 1.68        |
| Chanion         | 1.32 | 0.52 | 0.55 |      | 0.72        |
| Chiou           | 0.73 |      | 0.41 |      | 0.6         |
| Dramas          |      | 1.01 |      |      | 1.21        |
| Evoias          | 0.88 | 0.39 | 1.3  | 0.37 | 0.67        |
| Evrou           | 0.1  | 1.26 |      |      | 0.91        |
| Florinas        |      | 0.88 |      |      | 0.8         |
| Fokidas         | 0.82 |      |      |      | 0.8         |
| Fthiotidas      |      | 0.73 | 1.46 | 1.16 | 0.89        |
| Grebenon        | 2.27 |      |      |      | 1.71        |
| Ilias           | 1.39 |      | 1.14 | 0.22 | 0.91        |
| Ioanninon       | 1.21 | 0.89 |      |      | 1.17        |
| Irakleiou       | 0.35 | 0.5  | 0.26 |      | 0.45        |
| Karditsas       |      | 1.62 | 0.63 |      | 1           |
| Kastorias       |      | 0.8  | 2.54 |      | 1.08        |
| Kavalas         |      |      |      |      | 0.74        |
| Korinthias      | 1.43 | 0.83 | 1.01 | 1.8  | 1.21        |
| Kozanis         | 1.08 | 1.71 | 1.01 | 0.97 | 1.42        |
| Kykladon        | 0.72 | 1.01 | 0.58 | 1.01 | 0.85        |
| Lakonias        |      |      | 1.7  |      | 0.98        |
| Larissas        | 1.15 | 1.09 | 0.26 | 0.73 | 1.1         |
| Lasithiou       | 0.27 |      |      |      | 0.33        |
| Lesbou          |      |      |      |      | 0.56        |

|               |      |      |      |      |      |
|---------------|------|------|------|------|------|
| Magnisias     | 0.14 | 1.93 | 0.37 | 1.77 | 0.95 |
| Messinias     | 0.88 | 1.38 | 1.14 |      | 1.15 |
| Pellias       | 1.43 |      | 0.29 |      | 1.22 |
| Pierias       |      |      |      |      | 1.01 |
| Prevezas      | 0.84 | 1.11 | 1.89 |      | 1.1  |
| Rethymnis     |      | 1.88 |      |      | 1.6  |
| Rodopis       | 0.94 |      |      |      | 0.96 |
| Samou         |      | 0.52 | 0.72 | 0.83 | 0.61 |
| Serron        | 0.67 | 0.98 |      |      | 0.85 |
| Thesprotias   | 1.52 |      |      |      | 1.28 |
| Thessalonikis | 1.28 | 0.72 | 1.27 | 1.96 | 1.19 |
| Trikalon      | 0.66 | 1.74 |      | 3.36 | 1.69 |
| Zakynthou     |      |      | 0.25 |      |      |

**Table S2.** Summary of queen replacement rates across the years and regions

| Region          | 2018   | 2019   | 2020   | 2021   | Total Years |
|-----------------|--------|--------|--------|--------|-------------|
| Achaïas         |        | 61.50% | 67.10% | 61.20% | 65.90%      |
| Aitolokarnanias | 60.20% | 58.80% | 57.50% | 29.50% | 53.40%      |
| Argolidas       | 69%    |        |        |        | 65.50%      |
| Arkadias        |        |        |        |        | 53.90%      |
| Artas           | 27%    |        |        |        | 41.80%      |
| Attikis         | 48.30% | 49%    | 62.90% | 58.40% | 54.20%      |
| Biotias         | 57.20% | 70.90% | 64.10% | 62.90% | 62.80%      |
| Chalkidikis     | 77%    | 58.40% | 70.20% |        | 70.20%      |
| Chanion         | 75.60% | 59.10% | 38.30% |        | 55.10%      |
| Chiou           | 77.60% |        | 59.30% |        | 62.40%      |
| Dramas          |        | 20.40% |        |        | 37.60%      |
| Evoias          | 89.50% | 46.80% | 61%    | 59.40% | 61.20%      |
| Evrou           | 85.90% | 40.30% |        |        | 59.80%      |
| Florinas        |        | 62.80% |        |        | 66.90%      |
| Fokidas         | 36.20% |        |        |        | 55.40%      |
| Fthiotidas      |        | 74%    | 50.70% | 43.90% | 59.40%      |
| Grebenon        | 67.60% |        |        |        | 47.40%      |
| Ilias           | 88.80% |        | 45.60% | 39.60% | 55.90%      |
| Ioanninon       | 55.60% | 61.70% |        |        | 56%         |
| Irakleïou       | 62.90% | 49.90% | 75.70% |        | 58.40%      |
| Karditsas       |        | 32.30% | 51.40% |        | 46.70%      |
| Kastorias       |        | 87.20% | 119%   |        | 95.10%      |
| Kavalas         |        |        |        |        | 57.30%      |
| Korinthias      | 52.80% | 66.70% | 56.40% | 47.60% | 55.20%      |
| Kozanis         | 76%    | 36.80% | 49.70% | 47.20% | 49.50%      |
| Kykladon        | 65.20% | 61.40% | 70.60% | 43.90% | 60.10%      |
| Lakonias        |        |        | 53.60% |        | 59.80%      |
| Larissas        | 73.30% | 53.60% | 65.70% | 39.20% | 61.30%      |

|               |         |        |        |        |        |
|---------------|---------|--------|--------|--------|--------|
| Lasithiou     | 71.20%  |        |        |        | 68.80% |
| Lesbou        |         |        |        |        | 46.40% |
| Magnisias     | 58.90%  | 27.50% | 62.90% | 52.80% | 51.20% |
| Messinias     | 63.90%  | 63.60% | 48.10% |        | 60.50% |
| Pellas        | 53.40%  |        | 55.70% |        | 54.20% |
| Pierias       |         |        |        |        | 49.50% |
| Prevezas      | 59.20%  | 44.40% | 54.30% |        | 54.70% |
| Rethymnis     |         | 48.20% |        |        | 38%    |
| Rodopis       | 62.70%  |        |        |        | 52.10% |
| Samou         |         | 50.30% | 77.20% | 55.10% | 54.70% |
| Serron        | 45.30%  | 54.90% |        |        | 50.40% |
| Thesprotias   | 112.50% |        |        |        | 84.70% |
| Thessalonikis | 67.90%  | 62.80% | 55.30% | 47.50% | 59.40% |
| Trikalon      | 79.20%  | 32.10% |        | 19.20% | 40.90% |
| Zakynthou     |         |        |        |        |        |

**Table S3:** Summary of overwintering locations across the years

| Location          | 2019  | 2020  | 2021  | Total Years (%±SD) |
|-------------------|-------|-------|-------|--------------------|
| City              | 3.9%  | 10.7% | 5.6%  | 6.4% ±3.5%         |
| Forest            | 20.9% | 14.7% | 20.6% | 18.9% ±3.5%        |
| Meadow            | 37.4% | 40%   | 37.3% | 38.2% ±1.5%        |
| Agricultural area | 23.8% | 23.3% | 23%   | 23.4% ±0.4%        |
| None of the above | 14.1% | 11.3% | 13.5% | 13.1% ±1.44%       |

**Table S4.** Summary of Acaricide treatment across the years

| Method           | 2018   | 2019   | 2020   | 2021   | Total Years (%±SD) |
|------------------|--------|--------|--------|--------|--------------------|
| Checking varroa  | 94 %   | 77.3%  | 84.6 % | 93.7 % | 87.4% ±8%          |
| Apply treatments | 93.6 % | 95.2 % | 96.6 % | 96.8 % | 95.2% ±1.5%        |
| Biotechnical     | 2.20%  | 0.53%  | 0.70%  | 2.50%  | 1.5% ±1%           |
| Synthetic        | 24.67% | 20.86% | 17.48% | 6.67%  | 18.9% ±7.7%        |
| Organic acid     | 38.77% | 30.48% | 34.27% | 40.83% | 35% ±4.7%          |
| Multiple         | 34.36% | 48.13% | 47.55% | 50%    | 43.7% ±7.2%        |

**Table S5:** Summary of beekeeper practices across the years

| Practice                   | 2019   | 2020   | 2021   | Total Years   |
|----------------------------|--------|--------|--------|---------------|
| Use screened bottom boards | 48.8 % | 52.8 % | 50 %   | 50.4% ±2.1%   |
| Use insulated hives        | 45 %   | 39.3 % | 58.8 % | 47% ±10%      |
| Use plastic hives          | 13 %   | 19.8 % | 28.7 % | 19.2% ±7.9%   |
| Use non-wax foundation     | 5.9 %  | 3 %    | 3.8 %  | 4.5% ±1.5%    |
| Sugar supplementing        | 4.1 kg | 3.7 kg | 5.3 kg | 4.3 kg ±0.8kg |
| Use varroa tolerant stock  | 15.1%  | 12.5%  | 26.2%  | 17.1% ±7.3%   |
| Do organic beekeeping      | 7.4%   | 10.8%  | 24.1%  | 12.6% ±7.3%   |
